# Supplementary material for: Oculomotor Dysfunction in Idiopathic and LRRK2-Parkinson’s Disease and At-Risk Individuals
Source: PubMed Central journal article supplement — J Parkinsons Dis. 2024 Jun 4;14(4):797–808. doi: 10.3233/JPD-230416 (PMC11191487; doi:10.3233/jpd-230416), 2024-06-04
Supplement: jpd-14-jpd230416-s001.pdf [file jpd-14-jpd230416-s001.pdf]

# Supplementary Material

## Oculomotor Dysfunction in Idiopathic and *LRRK2*-Parkinson's Disease and At-Risk Individuals

**Supplementary Table 1.** Comparison of oculomotor performance between L2NMC with normal and abnormal DaT-SPECT

|                                               | Normal DaT-SPECT<br>(N=8) | Abnormal DaT-SPECT<br>(N=13) | <i>p</i>    |
|-----------------------------------------------|---------------------------|------------------------------|-------------|
| Age, y                                        | 60.38 (10.06)             | 61.92 (8.08)                 | -           |
| Microsaccade number                           | 6.00 (3.79)               | 7.91 (6.98)                  | 0.43        |
| Microsaccade amplitude, °                     | 0.39 (0.16)               | 0.50 (0.21)                  | 0.26        |
| Microsaccade peak velocity, %/s               | 27.66 (7.18)              | 28.91 (10.12)                | 0.69        |
| SWJ, number                                   | 0.29 (0.49)               | 2.00 (2.65)                  | 0.068       |
| BCEA, ° <sup>2</sup>                          | 0.92 (0.96)               | 1.85 (1.79)                  | 0.15        |
| Horizontal prosaccade latency, ms             | 256.94 (19.38)            | 282.38 (46.47)               | 0.19        |
| Vertical prosaccade latency, ms               | 279.86 (46.74)            | 300.18 (54.80)               | 0.42        |
| Horizontal prosaccade peak velocity, %/s      | 367.42 (99.39)            | 293.21 (44.37)               | <b>0.04</b> |
| Vertical prosaccade peak velocity, %/s        | 242.45 (46.01)            | 239.76 (50.17)               | 0.90        |
| Horizontal prosaccade positive error, °       | 0.45 (0.15)               | 0.69 (0.40)                  | 0.12        |
| Horizontal prosaccade negative error, °       | -0.27 (0.1)               | -0.53 (0.64)                 | 0.35        |
| Vertical prosaccade positive error, °         | 0.43 (0.13)               | 0.72 (0.78)                  | 0.37        |
| Vertical prosaccade negative error, °         | -0.52 (0.55)              | -0.49 (0.31)                 | 0.81        |
| % Corrective antisaccades                     | 87.17 (28.93)             | 96.25 (7.69)                 | 0.28        |
| % Successful antisaccades                     | 86.88 (20.17)             | 85.77 (19.46)                | 0.97        |
| Horizontal corrective antisaccade latency, ms | 551.94 (126.66)           | 644.64 (153.60)              | 0.10        |
| Vertical corrective antisaccade latency, ms   | 577.57 (86.58)            | 679.90 (211.14)              | 0.26        |
| % Correct memory saccades                     | 95.71 (6.08)              | 90.39 (14.79)                | 0.34        |
| Horizontal memory saccade latency, ms         | 470.80 (215.93)           | 432.15 (286.08)              | 0.78        |
| Vertical memory saccade latency, ms           | 486.70 (133.99)           | 720.95 (708.19)              | 0.41        |

Mean values of oculomotor parameters in each L2NMC group, with standard deviations in brackets. Level of significance was calculated with general linear models, age and sex adjusted.

°, degrees; BCEA, Bivariate Contour Ellipse Area; L2NMC, Non Manifesting Carrier of the *LRRK2* G2019S mutation.

**Supplementary Table 2.** Correlation between oculomotor parameters and UPDRS-III and MoCA scores

|                                               | UPDRS-III |                | MoCA     |                   |
|-----------------------------------------------|-----------|----------------|----------|-------------------|
|                                               | <i>r</i>  | <i>p</i>       | <i>r</i> | <i>p</i>          |
| Age, y                                        | 0.32      | <b>0.0053</b>  | -0.57    | <b>0.00000017</b> |
| <b>Fixation test</b>                          |           |                |          |                   |
| Microsaccade number                           | -0.14     | 0.28           | 0.037    | 0.97              |
| Microsaccade amplitude, °                     | 0.02      | 0.86           | -0.10    | 0.27              |
| Microsaccade peak velocity, °/s               | -0.01     | 0.84           | 0.002    | 0.51              |
| SWJ, number                                   | -0.02     | 0.91           | -0.03    | 0.54              |
| BCEA, ° <sup>2</sup>                          | -0.04     | 0.17           | -0.28    | 0.23              |
| <b>Prosaccade test</b>                        |           |                |          |                   |
| Horizontal latency, ms                        | 0.38      | <b>0.024</b>   | -0.26    | 0.86              |
| Vertical latency, ms                          | 0.11      | 0.55           | -0.03    | 0.56              |
| Horizontal peak velocity, °/s                 | -0.13     | 0.63           | 0.11     | 0.66              |
| Vertical peak velocity, °/s                   | -0.19     | 0.28           | 0.24     | 0.35              |
| Horizontal positive error, °                  | 0.33      | <b>0.026</b>   | -0.13    | 0.94              |
| Horizontal negative error, °                  | -0.32     | <b>0.018</b>   | 0.11     | 0.59              |
| Vertical positive error, °                    | 0.15      | 0.45           | -0.08    | 0.79              |
| Vertical negative error, °                    | -0.28     | <b>0.034</b>   | 0.09     | 0.69              |
| <b>Antisaccade test</b>                       |           |                |          |                   |
| % Corrective antisaccades                     | -0.38     | <b>0.011</b>   | 0.45     | <b>0.016</b>      |
| % Successful antisaccades                     | -0.52     | <b>0.00022</b> | 0.61     | <b>0.00032</b>    |
| Horizontal corrective antisaccade latency, ms | 0.46      | <b>0.00051</b> | -0.55    | <b>0.00012</b>    |
| Vertical corrective antisaccade latency, ms   | 0.23      | 0.057          | -0.46    | <b>0.0077</b>     |
| <b>Memory saccade test</b>                    |           |                |          |                   |
| % Correct memory saccades                     | -0.28     | 0.059          | 0.57     | <b>0.00030</b>    |
| Horizontal memory saccade latency, ms         | 0.32      | <b>0.021</b>   | -0.61    | <b>0.000011</b>   |
| Vertical memory saccade latency, ms           | 0.21      | 0.24           | -0.36    | <b>0.036</b>      |

Correlation between UPDRS-III or MoCA scores and oculomotor parameters represented by Pearson's *r*, with level of significance calculated with linear regression analysis, age and sex adjusted.

°, degrees; BCEA, Bivariate Contour Ellipse Area; SWJ, square wave jerk.

**Supplementary Table 3.** Classification accuracy of oculomotor parameters in L2NMC

|                                                      | <b>AUC</b>   | <b><i>p</i></b> | <b>CI 95%</b> |
|------------------------------------------------------|--------------|-----------------|---------------|
| <b>Microsaccade amplitude, °</b>                     | <b>0.712</b> | <b>0.0057</b>   | (0.57, 0.86)  |
| <b>Microsaccade peak velocity, °/s</b>               | <b>0.671</b> | <b>0.026</b>    | (0.53, 0.81)  |
| <b>SWJ, number</b>                                   | 0.586        | 0.25            | (0.43, 0.74)  |
| <b>BCEA, °<sup>2</sup></b>                           | <b>0.739</b> | <b>0.0014</b>   | (0.61, 0.87)  |
| <b>Horizontal prosaccade latency, ms</b>             | <b>0.717</b> | <b>0.0023</b>   | (0.61, 0.83)  |
| <b>Vertical prosaccade latency, ms</b>               | <b>0.704</b> | <b>0.0043</b>   | (0.58, 0.82)  |
| <b>Vertical prosaccade negative error, °</b>         | <b>0.693</b> | <b>0.014</b>    | (0.55, 0.84)  |
| <b>Horizontal corrective antisaccade latency, ms</b> | 0.612        | 0.11            | (0.46, 0.76)  |
| <b>Vertical corrective antisaccade latency, ms</b>   | <b>0.681</b> | <b>0.013</b>    | (0.54, 0.82)  |
| <b>Horizontal memory saccade latency, ms</b>         | 0.608        | 0.13            | (0.47, 0.75)  |
| <b>Vertical memory saccade latency, ms</b>           | <b>0.713</b> | <b>0.0038</b>   | (0.59, 0.84)  |

°, degrees; BCEA, Bivariate Contour Ellipse Area; SWJ, square wave jerk.
